1           **The influence of landscape and environmental factors on ranavirus epidemiology in**  
2                                                                   **amphibian assemblages**

3  
4     Running title: *Ranavirus epidemiology in amphibians*

5  
6     Brian J. Tornabene<sup>1†</sup>, Andrew R. Blaustein<sup>2</sup>, Cheryl J. Briggs<sup>3</sup>, Dana M. Calhoun<sup>4</sup>, Pieter T. J.  
7                     Johnson<sup>4</sup>, Travis McDevitt-Galles<sup>4</sup>, Jason R. Rohr<sup>5</sup>, and Jason T. Hoverman<sup>1</sup>

8  
9     <sup>1</sup>Department of Forestry and Natural Resources, Purdue University, West Lafayette, IN 47907-  
10     2061 ([brian.tornabene@gmail.com](mailto:brian.tornabene@gmail.com) and [jhoverm@purdue.edu](mailto:jhoverm@purdue.edu))

11     <sup>2</sup>Integrative Biology, 3029 Cordley Hall, Oregon State University, Corvallis, OR 97331-2914  
12     ([blaustea@science.oregonstate.edu](mailto:blaustea@science.oregonstate.edu))

13     <sup>3</sup>Ecology, Evolution and Marine Biology, University of California, Santa Barbara, Santa Barbara,  
14     CA 93106-9610 ([cherie.briggs@lifesci.ucsb.edu](mailto:cherie.briggs@lifesci.ucsb.edu))

15     <sup>4</sup>Department of Ecology and Evolutionary Biology, University of Colorado at Boulder, Boulder,  
16     CO 80309-0334 ([pieter.johnson@colorado.edu](mailto:pieter.johnson@colorado.edu); [dana.calhoun@colorado.edu](mailto:dana.calhoun@colorado.edu);  
17     [tmcdevittgalles@gmail.com](mailto:tmcdevittgalles@gmail.com))

18     <sup>5</sup>Department of Integrative Biology, University of South Florida, Tampa, FL 33620  
19     ([rohr@usf.edu](mailto:rohr@usf.edu))

20     Correspondence: B.J. Tornabene, Email: [brian.tornabene@gmail.com](mailto:brian.tornabene@gmail.com), orcid.org/0000-0002-  
21     2348-311

24 **ACKNOWLEDGMENTS**

25           We thank Melina Allahverdian, Kelly DeRolf, Jackie Gregory, Emily Hannon, Jeremy  
26 Henderson, Megan Housman, Aaron Klingborg, Bryan LaFonte, Keegan McCaffrey, Mary  
27 Toothman, and Vanessa Wuerthner for assistance with data collection and sample processing.  
28 We also thank Michael Chislock, Erin Kenison, Emily McCallen, and Katherine Richgels for  
29 helpful discussions of data analyses. This research was supported by funding from the National  
30 Institutes of Health, Ecology, and Evolution of Infectious Diseases Program grant  
31 (R01GM109499), the National Science Foundation (DEB 1149308), and the David and Lucile  
32 Packard Foundation. For access to properties and logistical support, we thank the East Bay  
33 Regional Parks District, the East Bay Municipal Utility District, Santa Clara County Parks, Blue  
34 Oak Ranch Reserve (specific thanks to Michael Hamilton), California State Parks, The Nature  
35 Conservancy, and many private landowners. The content is solely the responsibility of the  
36 authors and does not necessarily represent the official views of the National Institutes of Health,  
37 Ecology, and Evolution of Infectious Diseases.

38

39 **ABSTRACT**

40 **Aim** To quantify the influence of a suite of landscape, abiotic, biotic, and host-level variables on  
41 ranavirus disease dynamics in amphibian assemblages at two biological levels (site and host-  
42 level).

43 **Location** Wetlands within the East Bay region of California, USA.

44 **Methods** We used competing models, multimodel inference, and variance partitioning to  
45 examine the influence of 16 landscape and environmental factors on patterns in site-level  
46 ranavirus presence and host-level ranavirus infection in 76 wetlands and 1,377 amphibian hosts  
47 representing five species.

48 **Results** The landscape factor explained more variation than any other factors in site-level  
49 ranavirus presence, but biotic and host-level factors explained more variation in host-level  
50 ranavirus infection. At both the site- and host-level, the probability of ranavirus presence  
51 correlated negatively with distance to nearest ranavirus-positive wetland. At the site-level,  
52 ranavirus presence was associated positively with taxonomic richness. However, infection  
53 prevalence within the amphibian population correlated negatively with vertebrate richness.  
54 Finally, amphibian host species differed in their likelihood of ranavirus infection: American  
55 Bullfrogs had the weakest association with infection while Western Toads had the strongest.  
56 After accounting for host species effects, hosts with greater snout-vent length had a lower  
57 probability of infection.

58 **Main conclusions** Strong spatial influences at both biological levels suggest that mobile taxa  
59 (e.g., adult amphibians, birds, reptiles) may facilitate the movement of ranavirus among hosts  
60 and across the landscape. Higher taxonomic richness at sites may provide more opportunities for  
61 colonization or the presence of reservoir hosts that may influence ranavirus presence. Higher

62 host richness correlating with higher ranavirus infection is suggestive of a dilution effect that has  
63 been observed for other amphibian disease systems and warrants further investigation. Our study  
64 demonstrates that an array of landscape, environmental, and host-level factors were associated  
65 with ranavirus epidemiology and illustrates that their importance vary with biological level.

66 **Key words** amplification effect, disease dynamics, dilution effect, dilution host, emerging  
67 infectious diseases, generalized linear model, multimodel inference, Iridovirus, reservoir species

## 69 INTRODUCTION

70 Infectious diseases are increasingly recognized as important components of communities  
71 and ecosystems, yet their emergence in humans, wildlife, and plants across the globe has sparked  
72 concern because of their potentially devastating effects on populations (Daszak *et al.*, 2000;  
73 Dobson & Foufopoulos, 2001; Jones *et al.*, 2008). While decades of research have demonstrated  
74 the important roles of landscape and environmental (e.g., abiotic conditions and species  
75 interactions) processes in driving disease dynamics (reviewed in Poulin, 1998, 2007), a perpetual  
76 challenge in disease ecology is that the individual factors studied and their relative importance  
77 can be highly system-specific. For example, climate is cited as a major influence on vector-borne  
78 diseases (Githeko *et al.*, 2000; Rogers & Randolph, 2006; Rohr *et al.* 2011; Mordecai *et al.*  
79 2017), flooding can influence the prevalence of cholera (reviewed in Ahern *et al.*, 2005), and  
80 loss of biodiversity can influence the prevalence of Lyme disease (Ostfeld & Keesing, 2000;  
81 Keesing *et al.*, 2006; Keesing *et al.*, 2010). Thus, for many emerging diseases, there is a need to  
82 conduct comprehensive field surveillance studies that combine assessments of key  
83 epidemiological parameters (e.g., presence, infection, pathogen load) with landscape and  
84 environmental data to determine the potential drivers of disease patterns across the landscape.

85 Determining which factor—or groups of factors—is most influential can help to develop  
86 predictions, increase our knowledge base for host pathogen-interactions, and inform management  
87 and conservation (Rohr *et al.* 2015).

88         Recent studies have highlighted the importance of investigating the influence of factors at  
89 multiple biological levels of organization because of contrasting results between levels (e.g., site-  
90 versus individual-level; Borcard *et al.*, 2004; Dunn *et al.*, 2010; Schotthoefer *et al.*, 2011; Liu *et*  
91 *al.* 2013; Johnson *et al.*, 2015a; Cohen *et al.*, 2016). It has been hypothesized that abiotic factors  
92 influence distributional patterns at larger levels whereas biotic factors (e.g., species interactions)  
93 influence distributional patterns at smaller levels (Wiens, 1989; Levin, 1992; Rahbek, 2004;  
94 McGill, 2010; Cohen *et al.*, 2016). Accordingly, abiotic (e.g., temperature, precipitation,  
95 altitude) and biotic (e.g., host richness) factors were highly important in predicting the  
96 distribution of three pathogens (the pathogenic fungus *Batrachochytrium dendrobatidis* (Bd),  
97 West Nile virus, and the bacterium that causes Lyme disease (*Borrelia burgdorferi*), but biotic  
98 factors were more important at smaller levels (Cohen *et al.*, 2016). Landscape factors, such as  
99 connectivity among habitat patches, can also influence disease dynamics and the dispersal of  
100 pathogens. For example, the movement of the pathogenic fungus Bd through amphibian  
101 assemblages across the landscape suggests that dispersal plays a key role at regional levels  
102 (Laurance *et al.*, 1996; Lips *et al.*, 2008; Rohr *et al.* 2008; Vredenburg *et al.*, 2010; Liu *et al.*  
103 2013). Therefore, evaluating which factors are most influential to the distribution of diseases,  
104 and at what levels of organization, is important to gain a clear understanding of what controls the  
105 spread of diseases among hosts *and* across the landscape.

106         Ranaviruses are viral pathogens of amphibians, fishes, and reptiles that have been  
107 implicated in mortality events across the globe (Duffus *et al.*, 2015). Over the last two decades,

108 reports of mortality events in amphibian populations have gradually increased in the literature  
109 (Duffus *et al.*, 2015). Consequently, experimental studies and field surveys have been initiated to  
110 explore the potential drivers of ranavirus disease dynamics. Recent reviews have highlighted  
111 environmental factors that could influence ranaviral disease dynamics (Brunner *et al.*, 2015). For  
112 example, abiotic factors such as land use (e.g., cattle grazing and urbanization), water quality,  
113 and contaminants from runoff (e.g., nutrients, pesticides, heavy metals) are associated with  
114 increased prevalence of ranavirus in experimental studies and in the field (Forson & Storfer,  
115 2006a; Forson & Storfer, 2006b; Kerby & Storfer, 2009; Kerby *et al.*, 2011; North *et al.*, 2015).  
116 In the United Kingdom (U.K.), deeper ponds were associated with an increased incidence of die-  
117 off events (North *et al.*, 2015). However, few studies have broadly explored the role of wetland  
118 characteristics on ranavirus occurrence or prevalence (Hoverman *et al.*, 2012a), particularly  
119 within an entire amphibian assemblage. In addition to abiotic factors, biotic factors (e.g.,  
120 competition, predation, reservoir species) likely play a role in ranavirus distribution and  
121 dynamics. For instance, American Bullfrogs (*Rana catesbeiana*) and fish are implicated as  
122 potential reservoirs for the pathogen (Brunner *et al.*, 2015). It has also been hypothesized that  
123 predators can increase disease risk by inducing physiological stress that compromises immune  
124 function (Reeve *et al.*, 2013). Thus, while there are many hypothesized abiotic and biotic drivers  
125 of ranavirus emergence, there have been few attempts to assess the relative importance of these  
126 factors using large-scale field patterns for this pathogen.

127         The influences of landscape processes on ranavirus dynamics have received relatively  
128 little attention (Gahl & Calhoun, 2008; Hoverman *et al.*, 2012a; North *et al.*, 2015). Given that  
129 amphibians are often characterized by metapopulation dynamics (Gulve, 1994), the movement of  
130 infected hosts between breeding sites in close proximity to each other could influence spatial

131 patterns in ranavirus occurrence on the landscape. Spatial models explained more variation than  
132 non-spatial models for ranavirus mortality events in the U.K. (North *et al.*, 2015; Price *et al.*,  
133 2016). However, no spatial relationships were observed for mortality events in Acadia National  
134 Park, Maine, U.S.A (Gahl & Calhoun, 2008). An additional challenge is that most studies on the  
135 distribution of ranaviruses come from mortality events either detected by scientists or members  
136 of the public. This non-random selection of samples provides only sparse insight into the  
137 baseline epidemiology of ranaviruses in amphibian populations or the landscape and  
138 environmental processes underlying these patterns.

139         In the current study, our primary objective was to quantify the influence of a suite of  
140 landscape, abiotic, and biotic variables on ranavirus disease dynamics in amphibian assemblages.  
141 To this end, we conducted comprehensive field surveys of 93 wetlands to collect data on  
142 infection presence and prevalence within each amphibian population and obtain corresponding  
143 information on the biological and environmental characteristics associated with epidemiological  
144 observations. By collecting data from multiple amphibian host species and at both the individual  
145 and population (wetland) levels, we sought to broadly evaluate the influence of an array of  
146 factors on ranavirus epidemiology and how these factors influenced pathogen dynamics between  
147 two biological levels. To determine the relative influence of landscape, abiotic, and biotic factors  
148 on ranavirus, we used model selection and multi-model averaging followed by variance  
149 partitioning, thereby allowing us to assess the joint effects of hypothesized covariates and how  
150 they varied between the site-level and individual host-level.

## 151 **METHODS**

### 152 *Study area and species*

153         We examined patterns of ranavirus presence and infection in wetland amphibian

154 assemblages located in the East Bay region of California (Figure 1; Hoverman *et al.*, 2012b;  
155 Johnson *et al.*, 2013b; Richgels *et al.*, 2013). We sampled 93 wetlands in managed parks and  
156 preserves within three counties (i.e., Alameda, Contra Costa, and Santa Clara; Johnson *et al.*,  
157 2016). We selected wetlands that were smaller (< 2 ha) and likely to contain amphibian  
158 assemblages (Hoverman *et al.*, 2012b). Visitation to wetlands was haphazard, but was not  
159 spatiotemporally randomized because of logistical constraints. The amphibian assemblage in this  
160 region is composed of seven species: Northern Pacific Tree Frogs (*Hyla regilla*), Western  
161 Toads (*Anaxyrus boreas*), American Bullfrogs (*R. catesbeiana*), California Newts (*Taricha*  
162 *torosa*), Rough-skinned Newts (*T. granulosa*), California Red-legged Frogs (*Rana draytonii*),  
163 and California Tiger Salamanders (*Ambystoma californiense*). Given the threatened status of  
164 California Red-legged Frogs and California Tiger Salamanders, we recorded them during  
165 surveys but excluded them from ranavirus sampling.

166 *Field sampling, assessing ranavirus infection, and determining environmental variables*

167 We conducted field surveys from May–August 2013 using the field sampling protocols of  
168 Hoverman *et al.* (2012b). In brief, we used a combination of visual encounter surveys, dipnet  
169 sweeps, and habitat-stratified seine hauls to sample the wetlands (Johnson *et al.*, 2013b; Richgels  
170 *et al.*, 2013). We disinfected all gear (e.g., nets and waders) with 15% bleach between sites. In  
171 the field, we identified amphibians to species, fishes to genus or species, and macroinvertebrates  
172 to order, family, or genus (Supplementary Table S1). At each wetland, we randomly selected up  
173 to 20 individuals (larvae, metamorphs, or both) per species for ranavirus screening. We  
174 necropsied individuals and sampled a portion of kidney and liver tissue for ranavirus. Equipment  
175 was flame sterilized between individuals. For each individual, ranaviral DNA was extracted from  
176 the combined liver and kidney tissue sample and infection was determined using standard



177 quantitative PCR protocols (Forson & Storfer, 2006b).

178         We used an array of landscape, abiotic, and biotic predictor variables to represent  
179 environmental influences on ranavirus dynamics guided by theory and previous investigations  
180 (Table 1). Our landscape variable was distance to nearest ranavirus-infected wetland (other than  
181 the wetland the individual was found in). To calculate this distance, we recorded latitude and  
182 longitude of each site and measured Euclidean distance to nearest ranavirus-infected wetland  
183 using the R function ‘dist’. From the generated distance matrix, we deleted columns representing  
184 distances of each wetland to uninfected wetlands, and sorted to isolate distance to nearest  
185 ranavirus-infected wetland for each wetland and individual within each wetland. This method is  
186 limited in that not all wetlands in the landscape were sampled; thus, ranavirus-positive sites  
187 could occur, but not have been visited. However, our sampling scheme sought to sample all  
188 neighboring wetlands within a contiguous area (e.g., a park or preserve), such that these  
189 estimates are likely to capture general patterns related to colonization potential.

190         We assessed wetland permanence (permanent or temporary), percent forest or wetland  
191 surrounding wetlands, wetland area, and water quality factors at each site. We assess wetland  
192 permanence (permanent or temporary) based on water depth, wetland area, and with additional  
193 verification from historical images in Google Earth (Johnson *et al.*, 2013c). We measured  
194 conductivity (S/m), total dissolved solids (mg/l), salinity (mg/l), and pH with a YSI meter  
195 (Model 556; Yellow Spring Instrument, Yellow Springs, Ohio, USA). We quantified total  
196 nitrogen (mg/l), dissolved organic carbon (mg/l), and total ammonia (mg/l) using standard  
197 methods (<http://snobear.colorado.edu/Kiowa/Kiowaref/procedure.html>; Johnson *et al.*, 2013c).  
198 We used PCA to reduce dimensionality of the seven abiotic water-quality variables that we  
199 measured. Water-quality variables, except pH, were log-transformed to reduce positive

200 skewness, and scaled and centered, before conducting the PCA. We retained only the first two  
201 components from PCA for further analyses, which had eigenvalues greater than one (Guttman-  
202 Kaiser criterion) and proportion of variance greater than the ‘broken-stick’ percentage  
203 (Supplementary Table S2; Yeomans & Golder, 1982; Kindt & Coe, 2005; Legendre & Legendre,  
204 2012). Principal component 1 had high loadings for total dissolved solids (loading = -0.58),  
205 salinity (-0.57), and conductivity (-0.54). Principal component 2 was associated with total  
206 nitrogen (loading = 0.64), dissolved organic carbon (0.58), ammonium (0.46), and, to a lesser  
207 extent, pH (0.14). We calculated the percentage of area within a 1-km radius of each wetland  
208 classified as forested (sum of all forest types) and wetland (open water) using ArcGIS and the  
209 National Landcover Database (Johnson *et al.*, 2013b; Homer *et al.*, 2015) because of our interest  
210 in the influence of intact forest and wetlands surrounding focal wetlands. We calculated wetland  
211 surface area (m<sup>2</sup>; hereafter, area) by walking the perimeter of the pond with a handheld GPS  
212 using the track function. Area was base-10 log-transformed to meet assumptions of normality for  
213 analyses.

214         We represented the biotic community with percent vegetation cover on wetland  
215 shorelines (hereafter, percent shoreline vegetation), taxonomic richness, vertebrate richness,  
216 amphibian catch per unit effort (herein, CPUE), and the presence or absence of fishes, cattle, and  
217 non-native *R. catesbeiana*. We visually estimated percent shoreline vegetation at each site. We  
218 determined vertebrate richness by counting the number of amphibian and fish taxa. Taxonomic  
219 richness included all amphibians, fishes, and macroinvertebrates (detailed methods in Johnson *et al.*  
220 *et al.*, 2016). We calculated CPUE by counting the number of individuals of each amphibian  
221 species during dip net sweeps and dividing by number of sweeps completed. We also included  
222 snout-vent length (mm), and species identity (*H. regilla*, *A. boreas*, *R. catesbeiana*, *T. torosa*, or

223 *T. granulosa*) into host-level analyses. Snout-vent length was scaled and centered among species

224 *Data analysis*

225 Our response variable for site-level analyses was ranavirus presence defined as one or  
226 more amphibians of any species infected with ranavirus within a wetland. We excluded wetlands  
227 with incomplete environmental data. Our response variable for host-level analyses was ranavirus  
228 infection defined as an individual having detectable ranavirus infection. We limited our ranavirus  
229 infection analyses only to wetlands where ranavirus was detected, which included infected and  
230 non-infected individuals. Therefore, we removed individuals from sites where ranavirus was not  
231 detected.

232 We assessed the influence of predictor variables on ranavirus presence and infection in  
233 amphibian assemblages with generalized linear models fitted with a binomial distribution and  
234 logit link. We conducted all analyses in program R v3.3.1 (R Development Core Team, 2015).  
235 We included base-10 log-transformed total number of individuals examined for ranavirus at each  
236 site as a fixed term to account for differences in the number of animals examined, which was  
237 expected to influence detection likelihood. For analyses of host-level infection, we used mixed  
238 effects models using the R package ‘lme4’ (Zuur *et al.*, 2009; Bates *et al.*, 2014) in which site  
239 was a random intercept term, thereby allowing us to nest observations from different amphibian  
240 species within the same site. We modeled host-level infection status (infected or not infected) to  
241 allow us to incorporate both host-level (e.g., body size) as well as site-level covariates  
242 (landscape, abiotic, and biotic). To keep models tractable, we initially used univariate analysis to  
243 identify associations between specific predictors variables and site-level ranavirus presence and  
244 host-level ranavirus infection. For univariate variable selection analyses, we used mixed model  
245 forms mentioned above (compared to correlations). Predictor variables with  $P$ -values  $< 0.10$

246 from these univariate analyses were combined together into a global model. We centered and  
247 scaled all continuous predictor variables to facilitate comparison of coefficients among predictor  
248 variables and improve numerical stability. For snout-vent length of amphibian hosts, we centered  
249 and scaled within each species to account for differences in snout-vent length among species. We  
250 did not include interaction terms in global models because we did not hypothesize strong  
251 interactions between or among predictor variables, and to keep models tractable. We tested for  
252 collinearity between predictor variables included in the global models using Pearson's  
253 correlation coefficients, and tested for multicollinearity among predictor variables in both global  
254 models with variance inflation factors with the R package 'car'. We also calculated dispersion  
255 parameters to examine overdispersion in global models for ranavirus presence and prevalence.  
256 Additionally, we estimated the variance in site-level ranavirus presence and host-level ranavirus  
257 infection accounted for by landscape, abiotic, biotic, or individual variables in global models  
258 with the 'varpart' function in the R package 'vegan' (Borcard *et al.*, 1992; Schotthoefer *et al.*,  
259 2011). We used the dredge function in the R package 'MuMIn' to create a set of all possible sub-  
260 models from ranavirus presence and infection global models and determine the best-supported  
261 model from the subset of predictor variables (Bartón, 2010). We compared models separately for  
262 ranavirus presence and infection analyses with an information-theoretic approach using Akaike's  
263 Information Criterion (AIC; Burnham & Anderson, 2004; Mazerolle, 2016). We used AIC  
264 corrected for small sample sizes (AIC<sub>C</sub>) for both analyses because the number of observations  
265 divided by number of parameters was low for most ranavirus presence models ( $n/K < 40$ ;  
266 Anderson & Burnham, 2002; Burnham & Anderson, 2004). Moreover, it is generally  
267 recommended to use AIC<sub>C</sub> because it converges to AIC with large samples sizes such as we  
268 included in ranavirus infection analyses (Anderson & Burnham, 2002; Burnham & Anderson,

269 2004). We report model-averaged parameter estimates ( $\beta$ ), standard errors (SE), adjusted SE, and  
270 relative importance of each predictor variable averaged from top models ( $\Delta AIC_C$ ,  $< 4 AIC_C$   
271 units). We investigated normality of response and predictor variables using kernel density plots  
272 and Q-Q plots, checked assumptions of all top models, and checked normality of model residuals  
273 against fitted values for top models. We investigated spatial autocorrelation of site-level  
274 ranavirus presence and residuals of ranavirus presence and infection global models using  
275 Moran's I test in the R package 'spdep' (Borcard *et al.*, 1992; Schotthoefer *et al.*, 2011; Bivand,  
276 2013).

## 277 **RESULTS**

### 278 *Sampling overview*

279 In total, our site-level analyses included 76 wetlands and 1,377 amphibians sampled for  
280 ranavirus representing five species. We removed 17 of the 93 originally surveyed sites from site-  
281 level analyses because they had incomplete site- or host-level covariate data, or both. The most  
282 common amphibian species among wetlands were *H. regilla* and *T. torosa*, and most sites (35%)  
283 had three amphibian species (Fig. 2). Thirty-two percent of tested amphibians were positive for  
284 ranavirus ( $n = 441$  of 1,377). At least one infected individual occurred at 67% of wetlands ( $n =$   
285 51 of 76) and an average of 61% of individuals were infected at wetlands with ranavirus  
286 infection (95% CI = 53–68%). For host-level analyses, we removed 288 individuals from 25  
287 sites where ranavirus was not present; thus, we reduced our host-level sample size to 1,089  
288 individuals. The percentage of infected individuals at wetlands varied among species; *T.*  
289 *granulosa* had the highest average percentage of individuals infected (mean = 60%, 95% CI =  
290 48–71%) followed by *A. boreas* (36%, 26–45%), *T. torosa* (25%, 20–30%), *H. regilla* (25%, 20–  
291 30%), and *R. catesbeiana* (16%, 6–25%). We observed non-native *R. catesbeiana* at 29% ( $n =$

292 22) of wetlands and fish presence (i.e., *Gambusia affinis*, *Lepomis macrochirus*, *Carassius*  
293 *auratus*, *Ictalurus* spp., or *Micropterus* spp.) was observed at 26% of wetlands ( $n = 20$ ).

294

#### 295 *Model selection and multimodel inference*

296 Univariate analyses determined that landscape (distance to nearest ranavirus-infected  
297 wetland), abiotic (percent wetland), and biotic (CPUE and taxonomic richness) were associated  
298 with, and included in the global model for, site-level ranavirus presence. For host-level ranavirus  
299 infection, univariate analyses demonstrated that landscape (distance to nearest ranavirus-infected  
300 wetland), abiotic (percent wetland), biotic (*R. catesbeiana* presence and vertebrate richness), and  
301 host-level (snout-vent length and species identity) were associated with, and included in the  
302 global model for, host-level ranavirus infection. From the global models, we produced 16 total  
303 models comprised of four landscape and abiotic variables for site-level analysis of ranavirus  
304 presence and 64 total models comprised of six landscape, abiotic, biotic, and host-level variables  
305 for host-level analysis of ranavirus infection using the dredge function in R (Supplementary  
306 material Appendix 1, Tables A3 and A4). For site-level ranavirus presence analysis, four models  
307 were within 4 AIC<sub>C</sub> of the best-supported model (Supplementary material Appendix 1, Table  
308 A5). For host-level ranavirus infection analysis, eight models were within 4 AIC<sub>C</sub> of the best-  
309 supported model (Supplementary material Appendix 1, Table A6).

310 Landscape and biotic variables had the strongest associations with site-level ranavirus  
311 presence in our best-supported models (Table 2). Distance to nearest ranavirus-infected wetland  
312 and taxonomic richness were included in all best-supported models, while CPUE and nearby  
313 wetland area were only included half of the best supported-models. Wetlands that were farther  
314 from the nearest ranavirus-infected wetland had a lower likelihood of ranavirus presence ( $\beta = -$

315  $0.26 \pm 0.05$  [model-averaged coefficient  $\pm$  adjusted SE]; Fig. 3). Wetlands with greater  
316 taxonomic richness had a higher likelihood of ranavirus presence ( $\beta = 0.12 \pm 0.04$ ). Variance  
317 partitioning analyses demonstrated that the landscape variable, distance to nearest ranavirus-  
318 infected wetland, explained the most variance (adjusted  $R^2$  from variance partitioning = 0.18)  
319 and the biotic variable, taxonomic richness, explained a smaller portion of variance ( $R^2 = 0.09$ )  
320 in site-level ranavirus presence (Table 3).

321 The best-supported models for host-level ranavirus infection prevalence included  
322 landscape, abiotic, biotic, and host-level predictor variables (Table 4). Distance to nearest  
323 ranavirus-infected wetland, snout-vent length, species identity, and vertebrate richness had the  
324 strongest associations with ranavirus infection. Hosts in wetlands that were further from the  
325 nearest ranavirus-infected wetland had the lowest likelihood of ranavirus infection (distance  $\beta = -$   
326  $1.40 \pm 0.38$ ; Fig. 4). Hosts in wetlands with greater vertebrate richness, while controlling for host  
327 density, were less likely to be infected ( $\beta = -0.61 \pm 0.31$ ). Additionally, species differed in their  
328 likelihood of ranavirus infection. *Rana catesbeiana*, which was the reference level in the species  
329 identity variable, had the lowest likelihood of ranavirus infection ( $\beta = -4.09 \pm 0.90$ ; Fig. 5).  
330 *Taricha torosa* ( $\beta = 2.66 \pm 0.84$ ), *P. regilla* ( $\beta = 3.02 \pm 0.84$ ), *A. boreas* ( $\beta = 3.72 \pm 0.85$ ), and *T.*  
331 *granulosa* ( $\beta = 4.03 \pm 0.92$ ) had higher likelihood of ranavirus infection relative to *R.*  
332 *catesbeiana*. Finally, hosts with greater snout-vent length were less likely to be infected ( $\beta = -$   
333  $0.40 \pm 0.11$ ). Variance partitioning demonstrated that the biotic variable, taxonomic richness  
334 explained the most variation in ranavirus infection at the host-level (adjusted  $R^2 = 0.06$ ) followed  
335 by landscape (adjusted  $R^2 = 0.04$ ) and host-level variables (species identity and snout-vent  
336 length; adjusted  $R^2 = 0.03$ ; Table 3).

337 No spatial autocorrelation was observed for ranavirus presence ( $P = 0.865$ ) in site-level

338 observations based on Moran's I. Additionally, residuals for ranavirus presence and infection  
339 models with the most support were not spatially autocorrelated based on Moran's I ( $P > 0.792$ ).  
340 Collinearity between predictor variables was low; however, and as expected, collinearity was  
341 highest between distance to nearest ranavirus-infected wetland and the amount of nearby wetland  
342 area in both analyses ( $\rho = 0.64$  and  $0.61$ ). Variance inflation factors (VIFs) for all predictor  
343 variables in ranavirus presence and infection global models indicated low multicollinearity  
344 among variables (VIFs  $< 2.27$ ). Overdispersion was not observed in site-level ranavirus presence  
345 and host-level infection global models (dispersion parameters  $< 1$ ).

## 346 **DISCUSSION**

347 For any infectious disease, it is critical to identify the landscape and environmental  
348 factors that influence the distribution of the pathogen to develop a broader understanding of  
349 disease emergence and strategies for management and conservation. Here, we examined the  
350 landscape and environmental factors underlying patterns in site-level ranavirus presence and  
351 host-level ranavirus infection in amphibian assemblages in the East Bay region of California  
352 during 2013. We used comprehensive field surveillance data, rather than observations of  
353 mortality events commonly used to describe patterns in ranavirus disease dynamics, and model  
354 selection with multimodel inference to determine ranavirus epidemiology in the assemblage.  
355 Ranavirus was widespread throughout our study site and our analyses demonstrated that site- and  
356 host-level patterns in ranavirus epidemiology were more strongly associated with landscape and  
357 biotic factors (aspects of species richness), rather than abiotic factors.

358 At the landscape level, wetlands in closer proximity to ranavirus-positive wetlands were  
359 more likely to support ranavirus and have higher infection prevalence. To date, the influence of  
360 landscape processes on ranavirus dynamics is poorly understood. Disease risk might be greatest



361 for wetlands in close proximity to other infected wetlands, which has been found in other  
362 amphibian disease systems. For example, the movement of the pathogenic fungus Bd through  
363 amphibian assemblages across the landscape suggests that dispersal probably plays an important  
364 role (Laurance *et al.*, 1996; Lips *et al.*, 2008; Rohr *et al.* 2008; Vredenburg *et al.*, 2010; Liu *et al.*  
365 2013). Previous research has found equivocal results related to the spatial clustering of ranavirus-  
366 associated mortality events (Gahl & Calhoun, 2008; North *et al.*, 2015). Our findings suggest  
367 that the movement of infected amphibians among wetlands could distribute ranavirus from  
368 infected wetlands to other nearby wetlands. Amphibians can metamorphose from wetlands with  
369 ranavirus infections and the returning adults can harbor infections (Brunner *et al.*, 2004). For  
370 instance, a reconstructed ranavirus emergence event in the U.K. demonstrated a localized spread  
371 from nearby ponds with distances spread similar to known amphibian and frog dispersal  
372 distances (Price *et al.*, 2016). While this suggests that infected hosts can move ranavirus across  
373 the landscape, the movement patterns of infected hosts have not been explored. Given that the  
374 dispersal ability of most amphibians is relatively limited (Blaustein *et al.*, 1994; Wells, 2010),  
375 the probability of infected hosts reaching distant wetlands is relatively low. In our study, there  
376 was a 20 and 60% reduction in ranavirus presence and infection, respectively, at about 2 km.

377 Wetlands in close proximity to ranavirus-positive wetlands might have more frequent  
378 introductions of the virus into the system thereby increasing exposure and infection probabilities.  
379 Movement of other taxa (e.g., reptiles, birds, humans) either via sublethally infected hosts or  
380 immune taxa transporting ranavirus on their surfaces could also distribute ranavirus across the  
381 landscape (reviewed in Brunner *et al.*, 2015). However, the transfer of ranavirus on the surface  
382 of immune taxa might be rare given that ranaviruses can be rapidly degraded in the environment  
383 by naturally occurring plankton and microbes (Johnson & Brunner, 2014) and when wetland

384 drying occurs (Brunner *et al.*, 2007). Ranavirus could also be distributed across the landscape  
385 when rain events and flooding occur, which can connect nearby wetlands through the movement  
386 of water. Future research examining the movement of ranavirus-infected hosts and other sources  
387 of ranavirus dispersal among wetlands will provide critical information on how ranavirus moves  
388 across the landscape and influences disease risk.

389         The influence of biodiversity on disease risk has been a major focus of recent disease  
390 ecology research (Keesing *et al.*, 2006; Civitello *et al.* 2015; Johnson *et al.*, 2015b). Although  
391 rarely considered in ranavirus studies, we found that biotic factors broadly related to species  
392 richness were associated with ranavirus patterns. In our study, taxonomic richness correlated  
393 positively with the probability of ranavirus presence at the site-level whereas vertebrate richness  
394 was correlated negatively with host-level ranavirus infection prevalence. Greater taxonomic  
395 richness could increase the likelihood that ranavirus is introduced into a wetland (e.g., via mobile  
396 taxa) or the probability of successfully establishing in a species, as also found in other studies of  
397 parasites (e.g., Johnson *et al.*, 2013a; Rottstock *et al.*, 2014; Johnson *et al.*, 2016). Additionally,  
398 more diverse wetlands might support potential reservoirs for ranavirus infection, although there  
399 was no evidence that fish or non-native Bullfrog were associated with patterns in ranavirus  
400 infection. The negative association between vertebrate richness and infection is suggestive of a  
401 dilution effect, yet our field data lack estimates of transmission within the communities to  
402 confirm this mechanism. The dilution effect has been observed in other amphibian disease  
403 systems (trematodes and *B. dendrobatidis*; Searle *et al.*, 2011; Johnson *et al.*, 2013a; Venesky *et*  
404 *al.*, 2014a,b; Rohr *et al.*, 2015) and therefore might also occur for ranavirus. Because this is the  
405 first study to document associations between species richness and ranavirus dynamics, the  
406 mechanisms underlying these patterns are in need of further investigation with controlled

407 experiments.

408         Although environmental stressors have frequently been hypothesized as drivers of  
409 ranavirus epidemiology (Gray *et al.*, 2007; Greer & Collins, 2008; Brunner *et al.*, 2015), we  
410 found no significant interactions between ranavirus occurrence and the factors representing  
411 environmental stressors that we measured in this study. For instance, factors associated with  
412 cattle (i.e. cattle presence, reduced shoreline vegetation, increased ammonia) did not influence  
413 ranavirus presence or infection in our analyses. Additionally, there was no association with the  
414 amount of forest surrounding the wetlands, which functions as an indicator of habitat integrity.  
415 Lastly, there was no evidence that non-native *R. catesbeiana* or fishes contributed to ranavirus  
416 patterns, despite the postulated importance of these groups as reservoirs of ranavirus and other  
417 amphibian pathogens in other regions (Brunner *et al.*, 2015).

418         Host-level factors such as amphibian species identity were also a major factor in  
419 explaining infection prevalence. *Rana catesbeiana* exhibited the lowest likelihood of infection  
420 among the five species sampled in these wetlands. *Rana catesbeiana* had only 3% overall  
421 infection prevalence, even after accounting for site-level differences. Using *R. catesbeiana* as the  
422 reference species, infection tended to be higher in the remaining species. Our findings are  
423 similar to previous laboratory experiments where *R. catesbeiana* were relatively resistant to  
424 ranavirus infection compared to other amphibian species (Hoverman *et al.*, 2011). For the  
425 remaining species in the assemblage, there is a need to conduct experimental studies examining  
426 their susceptibility to ranavirus. Preliminary results from our research group have found high  
427 levels of susceptibility to infection and high mortality in *H. regilla*, and moderate infection and  
428 mortality in *A. boreas* (N.M. Hambalek, personal communication).

429         We observed that larger host body size (greater snout-vent length) reduced the probability

430 of ranavirus infection, even after accounting for species-level differences in body size. This  
431 observation coincides with an observation that body size was negatively associated with Bd  
432 infection or Bd-induced death (Rohr *et al.* 2013; Gervasi *et al.*, 2017), but positive (Raffel *et al.*  
433 2013; McMahon *et al.* 2014) and non-linear relationship (Raffel *et al.* 2010) have also been  
434 observed. It also coincides with frequent observations that juveniles might be more prone to  
435 infection than adults (i.e., with larger body sizes) in amphibians and fishes (Cullen *et al.*, 1995;  
436 Ariel & Owens, 1997; Cullen & Owens, 2002; Jensen *et al.*, 2011). Larger body size may be an  
437 indicator of a more-developed immune system, which could prevent infections from establishing  
438 (Miller *et al.*, 2011; Gervasi *et al.*, 2017). Future field-based and experimental studies  
439 investigating relationships among size, development, and ranavirus infection will undoubtedly  
440 benefit our understanding of ranavirus infection in amphibians.

## 441 **CONCLUSIONS**

442 Despite decades of research on ranavirus-amphibian interactions, our understanding of  
443 the factors underlying ranavirus epidemiology in natural systems remains limited. While  
444 numerous factors have been proposed as drivers of infection, it still remains unclear why the  
445 outcome of a ranavirus outbreak can vary from no obvious mortality to a massive die-off event  
446 (Brunner *et al.* 2015). Moreover, the predominant focus on ranavirus-associated mortality events  
447 has failed to capture baseline epidemiological patterns across the landscape. Using a dataset from  
448 76 wetlands, five amphibian species, and 1,377 hosts, our results illustrate that landscape and  
449 biotic factors were most important for explaining ranavirus epidemiology. In particular,  
450 landscape factors explained more variance at larger (site-level) biological levels while biotic and  
451 host-level factors explained more variance at smaller biological levels (host-level). Our findings  
452 are similar to those suggested for other disease distributions and highlight the importance of

453 investigating factors influencing disease epidemiology at multiple biological levels (Schotthoefer  
454 *et al.*, 2011; Johnson *et al.*, 2015a; Cohen *et al.*, 2016). Several variables such as cattle presence  
455 and water chemistry parameters, that are often cited to influence ranavirus epidemiology (Forson  
456 & Storfer, 2006a; Forson & Storfer, 2006b; Kerby & Storfer, 2009; Kerby *et al.*, 2011), were not  
457 influential in our study. Additionally, the variables we included in our analyses explained scant  
458 variability in site-level ranavirus presence and host-level ranavirus infection. Therefore, further  
459 experimental and field-based investigations of proposed and novel factors will undoubtedly help  
460 broaden our understanding of the dynamics of this emerging infectious pathogen and benefit  
461 management and conservation.

#### 462 **Literature Cited**

- 463  
464 Ahern, M., Kovats, R.S., Wilkinson, P., Few, R. & Matthies, F. (2005). Global health impacts of  
465 floods: epidemiologic evidence. *Epidemiologic reviews*, **27**, 36–46.
- 466 Anderson, D.R. & Burnham, K.P. (2002). Avoiding pitfalls when using information-theoretic  
467 methods. *Journal of Wildlife Management*, **66**, 912–918.
- 468 Ariel, E. & Owens, L. (1997). Epizootic mortalities in tilapia *Oreochromis mossambicus*.  
469 *Diseases of Aquatic Organisms*, **29**, 1–6.
- 470 Bartón, K. (2010). MuMIn: multi-model inference, 2010. *R package version*, **1**
- 471 Bates, D., Mächler, M., Bolker, B. & Walker, S. (2014). Fitting linear mixed-effects models  
472 using lme4. *arXiv preprint arXiv:1406.5823*,
- 473 Bivand, R.S. (2013). *spdep: Spatial Dependence: Weighting Schemes, Statistics and Models*. .
- 474 Blaustein, A.R., Wake, D.B. & Sousa, W.P. (1994). Amphibian declines: judging stability,  
475 persistence, and susceptibility of populations to local and global extinctions.  
476 *Conservation Biology*, **8**, 60–71.

- 477 Borcard, D., Legendre, P. & Drapeau, P. (1992). Partialling out the Spatial Component of  
478 Ecological Variation. *Ecology*, **73**, 1045–1055.
- 479 Borcard, D., Legendre, P., Avois-Jacquet, C. & Tuomisto, H. (2004). Dissecting the spatial  
480 structure of ecological data at multiple scales. *Ecology*, **85**, 1826–1832.
- 481 Brunner, J.L., Schock, D.M. & Collins, J.P. (2007). Transmission dynamics of the amphibian  
482 ranavirus *Ambystoma tigrinum* virus. *Dis Aquat Organ*, **77**, 87-95.
- 483 Brunner, J.L., Schock, D.M., Davidson, E.W. & Collins, J.P. (2004). Intraspecific reservoirs:  
484 Complex life history and the persistence of a lethal ranavirus. *Ecology*, **85**, 560–566.
- 485 Brunner, J.L., Storfer, A., Gray, M.J. & Hoverman, J.T. (2015). Ranavirus ecology and  
486 evolution: From epidemiology to extinction. *Ranaviruses: Lethal pathogens of*  
487 *ectothermic vertebrates* (ed. by M.J. Gray and G.D. Chinchar), pp. 71–104. Springer,  
488 New York, U.S.A.
- 489 Burnham, K.P. & Anderson, D.R. (2004). Multimodel inference - understanding AIC and BIC in  
490 model selection. *Sociological Methods & Research*, **33**, 261–304.
- 491 Civitello, D.J., Cohen, J., Fatima, H., Halstead, N.T., Liriano, J., McMahon, T.A., Ortega, C.N.,  
492 Sauer, E.L., Sehgal, T., Young, S. & Rohr, J.R. (2015) Biodiversity inhibits parasites:  
493 Broad evidence for the dilution effect. *Proceedings of the National Academy of Sciences*  
494 *of the United States of America*, **112**, 8667-8671.
- 495 Cohen, J.M., Civitello, D.J., Brace, A.J., Feichtinger, E.M., Ortega, C.N., Richardson, J.C.,  
496 Sauer, E.L., Liu, X. & Rohr, J.R. (2016). Spatial scale modulates the strength of  
497 ecological processes driving disease distributions. *Proceedings of the National Academy*  
498 *of Science of the United States of America*, **113**, E3359–64.

- 499 Cullen, B. & Owens, L. (2002). Experimental challenge and clinical cases of Bohle iridovirus  
500 (BIV) in native Australian anurans. *Diseases of aquatic organisms*, **49**, 83–92.
- 501 Cullen, B., Owens, L. & Whittington, R. (1995). Experimental infection of Australian anurans  
502 (*Limnodynastes terraereginae* and *Litoria latopalmata*) with Bohle iridovirus. *Diseases of*  
503 *Aquatic Organisms*, **23**, 83–92.
- 504 Daszak, P., Cunningham, A.A. & Hyatt, A.D. (2000). Emerging infectious diseases of wildlife--  
505 threats to biodiversity and human health. *Science*, **287**, 443.
- 506 Dobson, A. & Foufopoulos, J. (2001). Emerging infectious pathogens of wildlife. *Philosophical*  
507 *Transactions of the Royal Society of London Series B-Biological Sciences*, **356**, 1001–  
508 1012.
- 509 Duffus, A.L.J., Waltzek, T.B., Stöhr, A.C., Allender, M.C., Gotesman, M., Whittington, R.J.,  
510 Hick, P., Hines, M.K. & Marschang, R. (2015). Distribution and Host Range of  
511 Ranaviruses. *Ranaviruses: Lethal pathogens of ectothermic vertebrates* (ed. by M.J. Gray  
512 and G.D. Chinchar), pp. 9–57. Springer, New York, U.S.A.
- 513 Dunn, R.R., Davies, T.J., Harris, N.C. & Gavin, M.C. (2010). Global drivers of human pathogen  
514 richness and prevalence. *Proceedings of the Royal Society of London B: Biological*  
515 *Sciences*, **277**, 2587–95.
- 516 Forson, D. & Storfer, A. (2006a). Effects of atrazine and iridovirus infection on survival and life-  
517 history traits of the long-toed salamander (*Ambystoma macrodactylum*). *Environmental*  
518 *Toxicology and Chemistry*, **25**, 168–173.
- 519 Forson, D.D. & Storfer, A. (2006b). Atrazine increases ranavirus susceptibility in the tiger  
520 salamander, *Ambystoma tigrinum*. *Ecological Applications*, **16**, 2325–2332.

- 521 Gahl, M.K. & Calhoun, A.J.K. (2008). Landscape setting and risk of *Ranavirus* mortality events.  
522 *Biological Conservation*, **141**, 2679–2689.
- 523 Gervasi, S.S., Stephens, P.R., Hua, J., Searle, C.L., Xie, G.Y., Urbina, J., Olson, D.H., Bancroft,  
524 B.A., Weis, V., Hammond, J.I., Relyea, R.A. & Blaustein, A.R. (2017). Linking Ecology  
525 and Epidemiology to Understand Predictors of Multi-Host Responses to an Emerging  
526 Pathogen, the Amphibian Chytrid Fungus. *PLoS One*, **12**, e0167882.
- 527 Githeko, A.K., Lindsay, S.W., Confalonieri, U.E. & Patz, J.A. (2000). Climate change and  
528 vector-borne diseases: a regional analysis. *Bulletin of the World Health Organization*, **78**,  
529 1136–1147.
- 530 Gray, M.J., Miller, D.L., Schmutzer, A.C. & Baldwin, C.A. (2007). *Frog virus 3* prevalence in  
531 tadpole populations inhabiting cattle-access and non-access wetlands in Tennessee, USA.  
532 *Diseases of Aquatic Organisms*, **77**, 97–103.
- 533 Greer, A.L. & Collins, J.P. (2008). Habitat fragmentation as a result of biotic and abiotic factors  
534 controls pathogen transmission throughout a host population. *Journal of Animal Ecology*,  
535 **77**, 364–369.
- 536 Gulve, P.S. (1994). Distribution and extinction patterns within a northern metapopulation of the  
537 pool frog, *Rana lessonae*. *Ecology*, **75**, 1357–1367.
- 538 Homer, C., Dewitz, J., Yang, L.M., Jin, S., Danielson, P., Xian, G., Coulston, J., Herold, N.,  
539 Wickham, J. & Megown, K. (2015). Completion of the 2011 National Land Cover  
540 Database for the Conterminous United States - Representing a Decade of Land Cover  
541 Change Information. *Photogrammetric Engineering and Remote Sensing*, **81**, 345–354.



- 542 Hoverman, J.T., Gray, M.J., Haislip, N.A. & Miller, D.L. (2011). Phylogeny, life history, and  
543 ecology contribute to differences in amphibian susceptibility to ranaviruses. *Ecohealth*, **8**,  
544 301–319.
- 545 Hoverman, J.T., Gray, M.J., Miller, D.L. & Haislip, N.A. (2012a). Widespread occurrence of  
546 ranavirus in pond-breeding amphibian populations. *Ecohealth*, **9**, 36–48.
- 547 Hoverman, J.T., Mihaljevic, J.R., Richgels, K.L.D., Kerby, J.L. & Johnson, P. (2012b).  
548 Widespread co-occurrence of virulent pathogens within california amphibian  
549 communities. *Ecohealth*, **9**, 288–292.
- 550 Jensen, B.B., Holopainen, R., Tapiovaara, H. & Ariel, E. (2011). Susceptibility of pike-perch  
551 Sander lucioperca to a panel of ranavirus isolates. *Aquaculture*, **313**, 24–30.
- 552 Johnson, A.F. & Brunner, J.L. (2014). Persistence of an amphibian ranavirus in aquatic  
553 communities. *Diseases of Aquatic Organisms*, **111**, 129–138.
- 554 Johnson, P.T., de Roode, J.C. & Fenton, A. (2015a). Why infectious disease research needs  
555 community ecology. *Science*, **349**, 1259504.
- 556 Johnson, P.T., Wood, C.L., Joseph, M.B., Preston, D.L., Haas, S.E. & Springer, Y.P. (2016).  
557 Habitat heterogeneity drives the host-diversity-begets-parasite-diversity relationship:  
558 evidence from experimental and field studies. *Ecology Letters*, **19**, 752–61.
- 559 Johnson, P.T.J., Ostfeld, R.S. & Keesing, F. (2015b). Frontiers in research on biodiversity and  
560 disease. *Ecology Letters*, **18**, 1119–1133.
- 561 Johnson, P.T.J., Preston, D.L., Hoverman, J.T. & LaFonte, B.E. (2013a). Host and parasite  
562 diversity jointly control disease risk in complex communities. *Proceedings of the  
563 National Academy of Sciences of the United States of America*, **110**, 16916–16921.

- 564 Johnson, P.T.J., Preston, D.L., Hoverman, J.T. & Richgels, K.L.D. (2013b). Biodiversity  
565 decreases disease through predictable changes in host community competence. *Nature*,  
566 **494**, 230–233.
- 567 Johnson, P.T.J., Hoverman, J.T., McKenzie, V.J., Blaustein, A.R. & Richgels, K.L.D. (2013c).  
568 Urbanization and wetland communities: applying metacommunity theory to understand  
569 the local and landscape effects. *Journal of Applied Ecology*, **50**, 34–42.
- 570 Jones, K.E., Patel, N.G., Levy, M.A., Storeygard, A., Balk, D., Gittleman, J.L. & Daszak, P.  
571 (2008). Global trends in emerging infectious diseases. *Nature*, **451**, 990–994.
- 572 Keesing, F., Holt, R.D. & Ostfeld, R.S. (2006). Effects of species diversity on disease risk.  
573 *Ecology Letters*, **9**, 485–498.
- 574 Keesing, F., Belden, L.K., Daszak, P., Dobson, A., Harvell, C.D., Holt, R.D., Hudson, P., Jolles,  
575 A., Jones, K.E. & Mitchell, C.E. (2010). Impacts of biodiversity on the emergence and  
576 transmission of infectious diseases. *Nature*, **468**, 647–652.
- 577 Kerby, J.L. & Storfer, A. (2009). Combined effects of atrazine and chlorpyrifos on susceptibility  
578 of the tiger salamander to *Ambystoma tigrinum* virus. *Ecohealth*, **6**, 91–98.
- 579 Kerby, J.L., Hart, A.J. & Storfer, A. (2011). Combined effects of virus, pesticide, and predator  
580 cue on the larval tiger salamander (*Ambystoma tigrinum*). *Ecohealth*, **8**, 46–54.
- 581 Kindt, R. & Coe, R. (2005). *Tree diversity analysis: A manual and software for common*  
582 *statistical methods for ecological and biodiversity studies*. World Agroforestry Centre.
- 583 Laurance, W.F., McDonald, K.R. & Speare, R. (1996). Epidemic disease and the catastrophic  
584 decline of Australian rain forest frogs. *Conservation Biology*, **10**, 406–413.
- 585 Legendre, P. & Legendre, L. (2012). *Numerical ecology*, Third English edition. edn. Elsevier,  
586 Amsterdam.

- 587 Levin, S.A. (1992). The problem of pattern and scale in ecology: the Robert H. MacArthur award  
588 lecture. *Ecology*, **73**, 1943–1967.
- 589 Lips, K.R., Diffendorfer, J., Mendelson, J.R. & Sears, M.W. (2008). Riding the wave:  
590 Reconciling the roles of disease and climate change in amphibian declines. *PloS Biology*,  
591 **6**, 441–454.
- 592 Liu, X., Rohr, J.R. & Li, Y. (2013) Climate, vegetation, introduced hosts and trade shape a  
593 global wildlife pandemic. *Proceedings of the Royal Society of London B: Biological*  
594 *Sciences*, **280**, 20122506.
- 595 Mazerolle, M.J. (2016). *Model Selection and Multimodel Inference Based on (Q)AIC(c)*. R  
596 *Documentation for R: A language and environment for statistical computing*. R  
597 Foundation for Statistical Computing.
- 598 McGill, B.J. (2010). Ecology. Matters of scale. *Science*, **328**, 575–6.
- 599 McMahon, T.A., Sears, B.F., Venesky, M.D., Bessler, S.M., Brown, J.M., Deutsch, K., Halstead,  
600 N.T., Lentz, G., Tenouri, N., Young, S., Civitello, D.J., Ortega, N., Fites, J.S., Reinert,  
601 L.K., Rollins-Smith, L.A., Raffel, T.R. & Rohr, J.R. (2014) Amphibians acquire  
602 resistance to live and dead fungus overcoming fungal immunosuppression. *Nature*, **511**,  
603 224-227.
- 604 Miller, D.L., Gray, M.J. & Storfer, A. (2011). Ecopathology of ranaviruses infecting amphibians.  
605 *Viruses*, **3**, 2351–2373.
- 606 Mordecai, E.A., Cohen, J.M., Evans, M.V., Gudapati, P., Johnson, L.R., Lippi, C.A.,  
607 Miazgowicz, K., Murdock, C.C., Rohr, J.R. & Ryan, S.J. (2017) Detecting the impact of  
608 temperature on transmission of Zika, dengue, and chikungunya using mechanistic  
609 models. *PLoS Neglected Tropical Diseases*, **11**, e0005568.

- 610 North, A.C., Hodgson, D.J., Price, S.J. & Griffiths, A.G.F. (2015). Anthropogenic and  
611 Ecological Drivers of Amphibian Disease (Ranavirosis). *Plos One*, **10**, e0127037.
- 612 Ostfeld, R.S. & Keesing, F. (2000). Biodiversity and disease risk: the case of Lyme disease.  
613 *Conservation Biology*, **14**, 722–728.
- 614 Poulin, R. (1998). *Evolutionary ecology of parasites: from individuals to communities*. Chapman  
615 & Hall, New York, New York, U.S.A.
- 616 Poulin, R. (2007). *The Evolutionary Ecology of Parasites*, 2nd edn. Princeton University Press,  
617 Princeton, NJ.
- 618 Price, S.J., Garner, T.W., Cunningham, A.A., Langton, T.E. & Nichols, R.A. (2016).  
619 Reconstructing the emergence of a lethal infectious disease of wildlife supports a key role  
620 for spread through translocations by humans. *Proceedings of the Royal Society B*, **283**,  
621 20160952.
- 622 R Development Core Team (2015). R: A language and environment for statistical computing. R  
623 Foundation for Statistical Computing, Vienna, Austria. ISBN 3-900051-07-0, URL  
624 <http://www.r-project.org/>.
- 625 Raffel, T.R., Halstead, N.T., McMahon, T., Romansic, J.M., Venesky, M.D. & Rohr, J.R. (2013)  
626 Disease and thermal acclimation in a more variable and unpredictable climate. *Nature*  
627 *Climate Change*, **3**, 146-151.
- 628 Raffel, T.R., Michel, P.J., Sites, E.W. & Rohr, J.R. (2010) What drives chytrid infections in newt  
629 populations? Associations with substrate, temperature, and shade. *EcoHealth*, **7**, 526-536.
- 630 Rahbek, C. (2004). The role of spatial scale and the perception of large-scale species-richness  
631 patterns. *Ecology Letters*, **8**, 224–239.

- 632 Reeve, B.C., Crespi, E.J., Whipps, C.M. & Brunner, J.L. (2013). Natural stressors and ranavirus  
633 susceptibility in larval wood frogs (*Rana sylvatica*). *EcoHealth*, **10**, 190–200.
- 634 Richgels, K.L.D., Hoverman, J.T. & Johnson, P.T.J. (2013). Evaluating the role of regional and  
635 local processes in structuring a larval trematode metacommunity of *Helisoma trivolvis*.  
636 *Ecography*, **36**, 854–863.
- 637 Rogers, D. & Randolph, S. (2006). Climate change and vector-borne diseases. *Advances in*  
638 *parasitology*, **62**, 345–381.
- 639 Rohr, J.R., Civitello, D.J., Crumrine, P.W., Halstead, N.T., Miller, A.D., Schotthoefer, A.M.,  
640 Stenoien, C., Johnson, L.B. & Beasley, V.R. (2015). Predator diversity, intraguild  
641 predation, and indirect effects drive parasite transmission. *Proceedings of the National*  
642 *Academy of Sciences*, **112**, 3008–3013.
- 643 Rohr, J.R., Dobson, A.P., Johnson, P.T.J., Kilpatrick, A.M., Paull, S.H., Raffel, T.R., Ruiz-  
644 Moreno, D. & Thomas, M.B. (2011) Frontiers in climate change-disease research. *Trends*  
645 *in Ecology & Evolution*, **26**, 270-277.
- 646 Rohr, J.R., Raffel, T.R., Blaustein, A.R., Johnson, P.T.J., Paull, S.H. & Young, S. (2013) Using  
647 physiology to understand climate-driven changes in disease and their implications for  
648 conservation. *Conservation Physiology*, **1**, doi:10.1093/conphys/cot022.
- 649 Rohr, J.R., Raffel, T.R., Halstead, N.T., McMahon, T.A., Johnson, S.A., Boughton, R.K. &  
650 Martin, L.B. (2013) Early-life exposure to a herbicide has enduring effects on pathogen-  
651 induced mortality. *Proceedings of the Royal Society B-Biological Sciences*, **280**,  
652 20131502.

- 653 Rohr, J.R., Raffel, T.R., Romansic, J.M., McCallum, H. & Hudson, P.J. (2008) Evaluating the  
654 links between climate, disease spread, and amphibian declines. *Proceedings of the*  
655 *National Academy of Sciences of the United States of America*, **105**, 17436-17441.
- 656 Rottstock, T., Joshi, J., Kummer, V. & Fischer, M. (2014). Higher plant diversity promotes  
657 higher diversity of fungal pathogens, while it decreases pathogen infection per plant.  
658 *Ecology*, **95**, 1907-1917.
- 659 Schotthoefer, A.M., Rohr, J.R., Cole, R.A., Koehler, A.V., Johnson, C.M., Johnson, L.B. &  
660 Beasley, V.R. (2011). Effects of wetland vs. landscape variables on parasite communities  
661 of *Rana pipiens*: links to anthropogenic factors. *Ecological Applications*, **21**, 1257–1271.
- 662 Searle, C.L., Biga, L.M., Spatafora, J.W. & Blaustein, A.R. (2011). A dilution effect in the  
663 emerging amphibian pathogen *Batrachochytrium dendrobatidis*. *Proceedings of the*  
664 *National Academy of Sciences of the United States of America*, **108**, 16322–16326.
- 665 Venesky, M.D., Liu, X., Sauer, E.L. & Rohr, J.R. (2014a). Linking manipulative experiments to  
666 field data to test the dilution effect. *Journal of Animal Ecology*, **83**, 557–65.
- 667 Venesky, M.D., Raffel, T.R., McMahon, T.A. & Rohr, J.R. (2014b) Confronting inconsistencies  
668 in the amphibian-chytridiomycosis system: implications for disease management.  
669 *Biological Reviews*, **89**, 477-483.
- 670 Vredenburg, V.T., Knapp, R.A., Tunstall, T.S. & Briggs, C.J. (2010). Dynamics of an emerging  
671 disease drive large-scale amphibian population extinctions. *Proceedings of the National*  
672 *Academy of Sciences of the United States of America*, **107**, 9689–9694.
- 673 Wells, K.D. (2010). *The ecology and behavior of amphibians*. University of Chicago Press.
- 674 Wiens, J.A. (1989). Spatial scaling in ecology. *Functional ecology*, **3**, 385–397.

675 Yeomans, K.A. & Golder, P.A. (1982). The guttman-kaiser criterion as a predictor of the number  
676 of common factors. *Journal of the Royal Statistical Society Series D-the Statistician*, **31**,  
677 221–229.

678 Zuur, A.F., Leno, E.N., Wlaker, N., Saveliev, A.A. & Smith, G.M. (2009). *Mixed effects models*  
679 *and extensions in ecology with R*. Springer, New York, NY.

680

681 **SUPPORTING INFORMATION**

682 Table S1. Sampled amphibian, fish, and macroinvertebrate species in the East Bay Region of  
683 California in 2013.

684 Table S2. Results of principal component analysis for seven abiotic water variables and ‘broken-  
685 stick’ test.

686 Table S3. Results of univariate variable selection for correlation between site-level ranavirus  
687 presence and 14 predictor variables.

688 Table S4. Results of univariate variable selection for correlation between host-level ranavirus  
689 infection and 16 predictor variables

690 Table S5. Summary statistics for the four top-ranked models for site-level ranavirus presence.

691 Table S6. Summary statistics for the eight top-ranked models for host-level ranavirus presence.

692

693 **DATA ACCESSIBILITY STATEMENT**

694 Data used for spatial analyses and mapping available from the National Land Cover Database

695 (<https://catalog.data.gov/dataset/national-land-cover-database-nlcd-land-cover-collection>) and

696 the State of California Geoportal (<http://portal.gis.ca.gov/geoportal>). Ranavirus infection and

697 microhabitat data included in this study are available from the Pangea database (data deposited,

698 will insert link when posted and after review).

699

700 **BIOSKETCH**

701 **Brian Tornabene** is a PhD Student at the University of Montana in Missoula, Montana, USA.

702 His work focuses on natural history, ecotoxicology, and population and disease ecology—often



703 with herpetofauna. Currently, he is investigating the influence of brine contamination from oil  
704 and gas development on amphibian communities.

705

## 706 TABLES

707 Table 1. Predictor variables included to investigate patterns in landscape (L), abiotic (A), biotic  
708 (B), and host-level (H) influences on site-level ranavirus presence and host-level ranavirus  
709 infection in amphibian assemblages in the East Bay region of California in 2013. Host influences  
710 were only included in the host-level ranavirus infection analyses. Principal components 1 and 2  
711 are the product of reducing the dimensionality of seven water quality parameters.

|    | Variable                                            | Type |
|----|-----------------------------------------------------|------|
| 1  | Distance to nearest ranavirus-infected wetland (km) | L    |
| 2  | Percent forest surrounding                          | A    |
| 3  | Percent wetland surrounding                         | A    |
| 4  | Principal component 1                               | A    |
| 5  | Principal component 2                               | A    |
| 6  | Wetland area (m <sup>2</sup> )                      | A    |
| 7  | Wetland permanence (permanent or temporary)         | A    |
| 8  | Amphibian catch per unit effort                     | B    |
| 9  | Cattle presence                                     | B    |
| 10 | Fish presence                                       | B    |
| 11 | Percent shoreline vegetation                        | B    |
| 12 | <i>Rana catesbeiana</i> presence                    | B    |
| 13 | Taxonomic richness                                  | B    |

|    |                        |   |
|----|------------------------|---|
| 14 | Vertebrate richness    | B |
| 15 | Snout-vent length (mm) | H |
| 16 | Species identity       | H |

---

712

713

714 Table 2. Model-averaged coefficients for centered and scaled predictor variables from a subset of  
 715 models (delta AICc < 4 points, 4 of 16 models) of site-level ranavirus presence in amphibian  
 716 assemblages in the East Bay region of California in 2013. Coefficients are arranged by ascending  
 717 *P*-value, then alphabetically. “Distance” is distance to nearest ranavirus-infected wetland (km),  
 718 “Num. mod.” is the number of models that include that predictor variable, “Importance” is  
 719 percent of models within the model subset that contain that variable, “SE” is standard error, and  
 720 “Adj. SE” is adjusted standard error. Coefficients with  $P \leq 0.05$  are shaded in grey.

| Variable              | Num. mod. | Importance | Estimate | SE   | Adj. SE | <i>z</i> | <i>P</i> |
|-----------------------|-----------|------------|----------|------|---------|----------|----------|
| Distance              | 4         | 1.00       | -0.26    | 0.05 | 0.05    | 5.24     | < 0.001  |
| Taxonomic richness    | 4         | 1.00       | 0.12     | 0.04 | 0.04    | 2.61     | < 0.001  |
| Catch per unit effort | 2         | 0.57       | 0.09     | 0.05 | 0.05    | 1.65     | 0.099    |
| Total dissected       | 4         | 1.00       | 0.03     | 0.06 | 0.06    | 0.59     | 0.554    |
| Percent wetland       | 2         | 0.23       | 0.01     | 0.06 | 0.06    | 0.10     | 0.919    |

721

722 Table 3. Results of variance partitioning analyses quantifying the amount of unique variation  
 723 (adjusted  $R^2$ ) to landscape, abiotic, biotic, and host-level (Host) variables, and the shared  
 724 variation between and among the variable subsets, for site-level ranavirus presence and host-  
 725 level ranavirus infection. Host-level variables were only included in host-level analyses and  
 726 probability values can only be calculated for landscape, abiotic, biotic, and host-level  
 727 components. An asterisk (\*) indicates  $P < 0.01$  and two asterisks (\*\*) indicate  $P < 0.001$

| Variance<br>component | Ranavirus |           |
|-----------------------|-----------|-----------|
|                       | Presence  | Infection |
| Landscape (L)         | 0.190**   | 0.042**   |
| Abiotic (A)           | -0.007    | -0.001    |
| Biotic (B)            | 0.086*    | 0.058**   |
| Host (H)              |           | 0.031**   |
| LA                    | 0.105     | 0.027     |
| LB                    | -0.007    | -0.021    |
| LH                    |           | 0.014     |
| AB                    | -0.002    | 0.002     |
| AH                    |           | 0.000     |
| BH                    |           | 0.036     |
| LBH                   |           | 0.009     |
| ABH                   |           | 0.002     |
| LAH                   |           | 0.009     |
| LAB                   | 0.015     | -0.001    |
| LABH                  |           | 0.002     |

|          |       |       |
|----------|-------|-------|
| Residual | 0.621 | 0.811 |
|----------|-------|-------|

---

728

729 Table 4. Model-averaged coefficients for centered and scaled predictor variables from a subset of  
 730 models (delta AICc < 4 points, 8 of 64 models) of host-level ranavirus infection in amphibian  
 731 assemblages in the East Bay region of California in 2013. Coefficients are arranged by ascending  
 732 *P*-value, then alphabetically. “Distance” is distance to nearest ranavirus-infected, “Num. mod.” is  
 733 the number of models that include that predictor variable, “Importance” is percent of models  
 734 within the model subset that contain that variable, “SE” is standard error, and “Adj. SE” is  
 735 adjusted standard error. For species identity (Spp. identity), “ANBO” is *A. boreas*, “HYRE” is *H.*  
 736 *regilla*, “RACA” is *R. catesbeiana* (the reference level), “TAGR” is *T. granulosa*, and “TATO”  
 737 is *T. torosa*. Coefficients with  $P \leq 0.05$  are shaded in grey.

|                                | Num. mod | Importance | Estimate | SE   | Adj. SE | <i>z</i> | <i>P</i> |
|--------------------------------|----------|------------|----------|------|---------|----------|----------|
| Distance                       | 8        | 1.00       | -1.40    | 0.38 | 0.38    | 3.68     | < 0.001  |
| Snout-vent length              | 8        | 1.00       | -0.40    | 0.11 | 0.11    | 3.52     | < 0.001  |
| Spp. identity - ANBO           | 8        | 1.00       | 3.72     | 0.85 | 0.85    | 4.36     | < 0.001  |
| Spp. identity - HYRE           | 8        | 1.00       | 3.02     | 0.84 | 0.84    | 3.60     | < 0.001  |
| Spp. identity - RACA           | 8        | 1.00       | -4.09    | 0.90 | 0.91    | 4.52     | < 0.001  |
| Spp. identity - TAGR           | 8        | 1.00       | 4.03     | 0.92 | 0.92    | 4.40     | < 0.001  |
| Spp. identity - TATO           | 8        | 1.00       | 2.66     | 0.84 | 0.84    | 3.17     | 0.001    |
| Vertebrate richness            | 4        | 0.71       | -0.61    | 0.30 | 0.31    | 1.99     | 0.047    |
| <i>R. catesbeiana</i> presence | 4        | 0.39       | -0.78    | 0.75 | 0.75    | 1.04     | 0.298    |
| Percent Wetland                | 4        | 0.39       | -0.56    | 0.59 | 0.59    | 0.96     | 0.337    |

738

739

740 **FIGURE LEGENDS**

741 Fig. 1. Study area and wetlands included in site-level analyses ( $n = 76$ ) in three counties  
742 (Alameda, Contra Costa, and Santa Clara) of the East Bay region of California in 2013. Black  
743 points represent sites with ranavirus presence (those included in host-level analyses) and white  
744 points represent sites without ranavirus presence. Ranavirus was not detected at the southwest  
745 sites (those not included in the bottom inset map) within Santa Clara county.

746

747 Fig. 2. Percent of wetlands with each species (a), species richness at wetlands (b), percent of  
748 wetlands with ranavirus infected hosts for each species (c), and mean percent of hosts infected  
749 with ranavirus per wetland (with 95% CI) of those collected of each species (d) in amphibian  
750 assemblages in the East Bay region of California in 2013. Numbers above bars indicate number  
751 of wetlands with each species or species richness ( $n = 76$ ). For plots (a), (c), and (d): AMCA,  
752 *Ambystoma californiense* (California Tiger Salamander); ANBO, *Anaxyrus boreas* (Western  
753 Toad); RACA, *Rana catesbeiana* (American Bullfrog); HYRE, *Hyla regilla* (Northern Pacific  
754 Tree Frog); RADR, *Rana draytonii* (California Red-legged Frog); TAGR, *Taricha granulosa*  
755 (Rough-skinned Newt); TATO, *Taricha torosa* (California Newt).

756

757 Fig. 3. Model-averaged predicted probability of site-level ranavirus presence ( $n = 76$ ) in  
758 amphibian assemblages in the East Bay region of California in 2013 with increasing (a) distance  
759 to nearest ranavirus-infected wetland (Distance, km), and (b) taxonomic richness in wetlands in  
760 2013. Points for taxonomic richness are jittered to reduce overlap.

761

762

763 Fig. 4. Model-averaged predicted probability of host-level ranavirus infection ( $n = 1,089$ ) in  
764 amphibian assemblages in the East Bay region of California in 2013 with increasing (a) distance  
765 from nearest ranavirus-infected wetland (Distance, km), (b) snout-vent length, and (c) vertebrate  
766 richness. Points for vertebrate richness are jittered to reduce overlap.

767

768 Fig. 5. Model-averaged predicted probability of ranavirus infection with standard error ( $n =$   
769 1,089) for amphibian hosts in the East Bay region of California in 2013. For species: ANBO,  
770 *Anaxyrus boreas* (Western Toad); HYRE, *Hyla regilla* (Northern Pacific Tree frog); RACA,  
771 *Rana catesbeiana* (American Bullfrog; the reference level); TAGR, *Taricha granulosa* (Rough-  
772 skinned Newt); and TATO, *Taricha torosa* (California Newt).

773

774

775

776

777

778

779

780

781

782

783

784

785



786 **FIGURES**

787

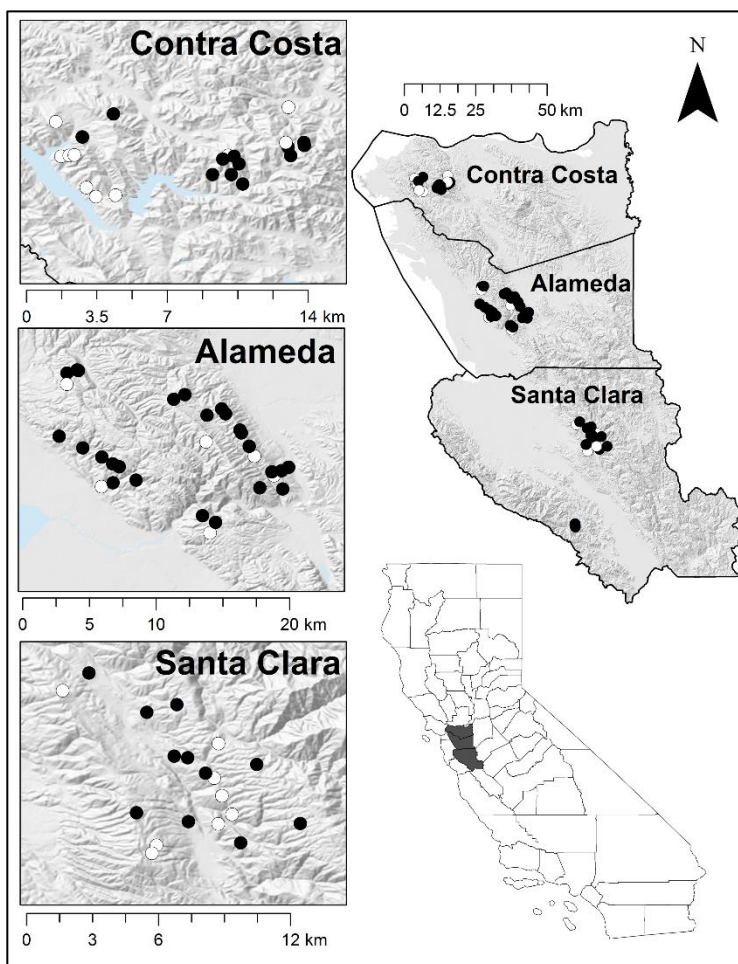

788

**Fig. 1**

789

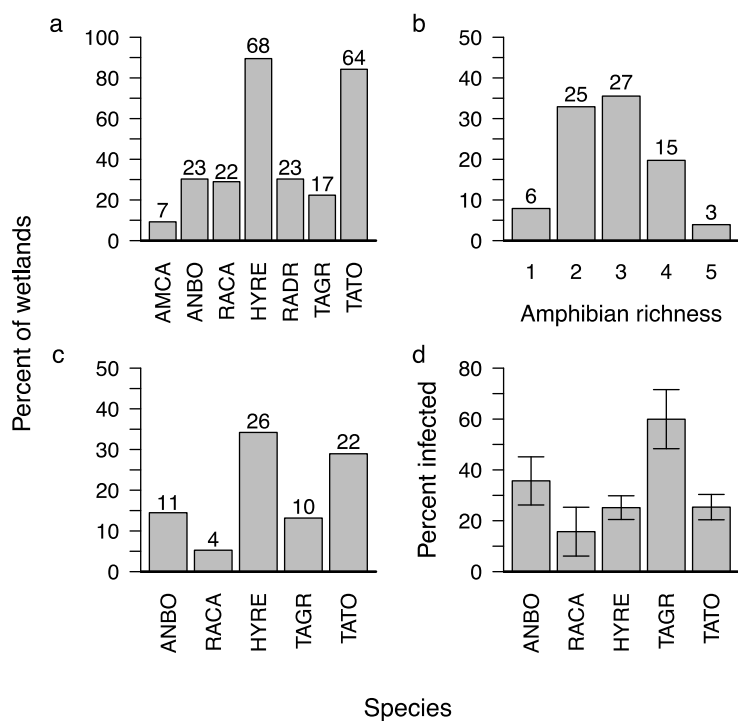

790

**Fig. 2**

791

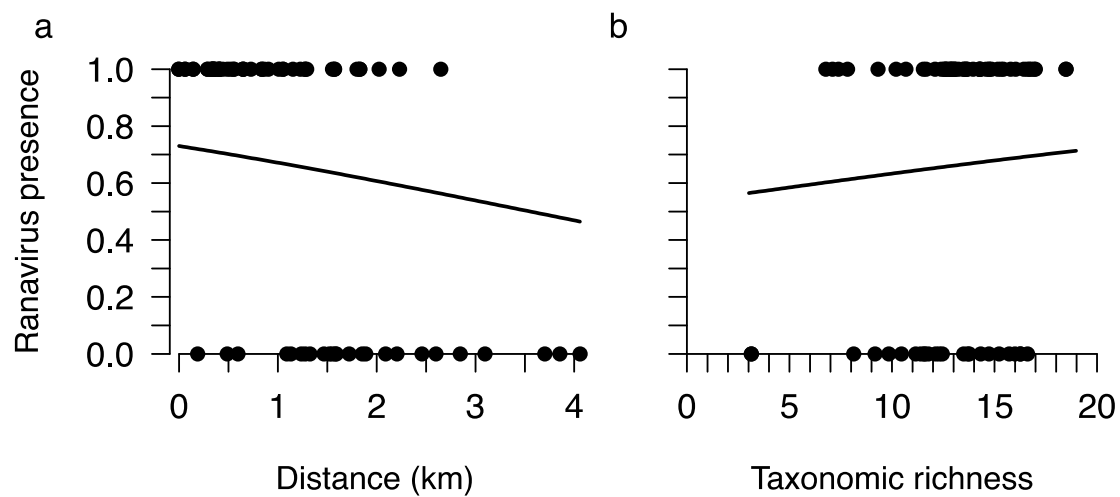

792

Fig. 3

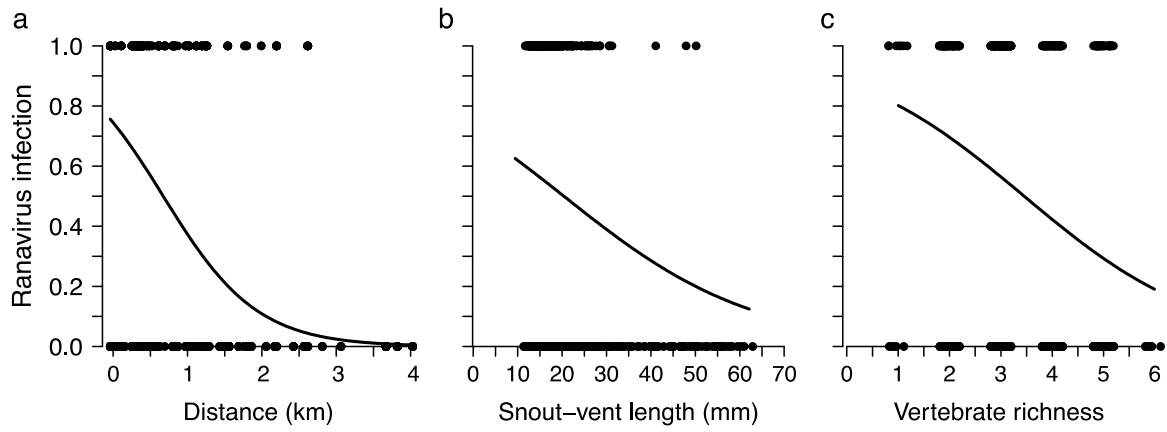

**Fig. 4**

793

794

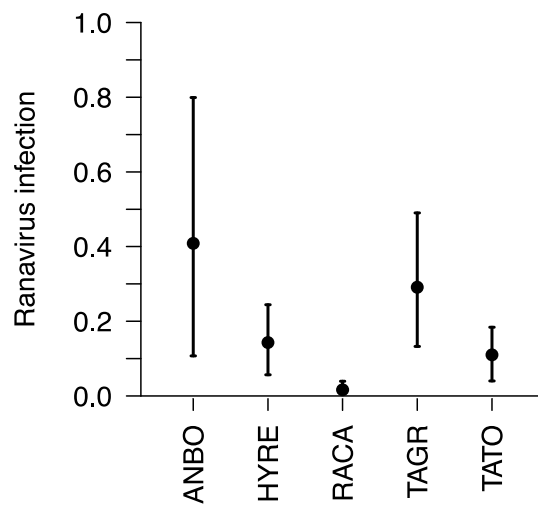

**Fig. 5**

795

796
